# Supplementary material for: Comprehensive Identification and Alternative Splicing of Microexons in Drosophila
Source: Front Genet. 2021 Mar 30;12:642602. doi: 10.3389/fgene.2021.642602 (PMC8042270; doi:10.3389/fgene.2021.642602)
Supplement: Supplementary Table 6 — List of AS microexons that are specifically spliced and included in tissues. [file Table_6.XLS]

## Sheet: Sheet1
Table S6. List of AS microexons that are specifically spliced and included in tissues
	Events								PSI value
	Chromosome	Up exon end	Microexon start	Microexon end	Down exon start	Strand	Gene id	Tag	Male body	Male head	Male testis	Female body	Female head	Female ovary
only in head	4	636618	638600	638626	638966	-	FBgn0039916	Novel	0	0.9	0	0	0.947368	0
	4	636618	638600	638626	639015	-	FBgn0039916	Novel	0	0.137055	0	0	0.11882	0
	2R	1113725	1116388	1116413	1120625	+	FBgn0003256	Novel	0	0.293622	0	0	0	0
	2R	1113725	1116388	1116413	1124963	+	FBgn0003256	Novel	0	0.0187313	0	0	0	0
	3L	1288238	1289999	1290028	1290286	+	FBgn0052333	FlyBase	0	0	0	0	0.2	0
	3L	4563896	4564538	4564549	4577917	+	FBgn0260657	FlyBase	0	0.628358	0	0	0.675192	0
	3L	4563896	4564538	4564549	4578760	+	FBgn0260657	FlyBase	0	1	0	0	0.95122	0
	3L	4816645	4816705	4816731	4816987	-	FBgn0261797	FlyBase	0	0.73	0	0	0.776442	0
	X	6125095	6125952	6125975	6126245	-	FBgn0264386	FlyBase	0	0.691342	0	0	0.568103	0
	X	6132313	6133695	6133721	6135702	-	FBgn0264386	Novel	0	0.253846	0	0	0.401961	0
	2L	7184203	7184386	7184394	7184615	+	FBgn0031893	Novel	0	0.0374183	0	0	0.562762	0
	2R	7320764	7321367	7321378	7321583	-	FBgn0033159	Novel	0	0.294709	0	0	0.197873	0
	2R	7320764	7322383	7322397	7322560	-	FBgn0033159	Novel	0	0.751708	0	0	0.701703	0
	2R	7321646	7322383	7322397	7322560	-	FBgn0033159	Novel	0	0.960674	0	0	0.831349	0
	2R	7321649	7322383	7322397	7322560	-	FBgn0033159	Novel	0	0.392935	0	0	0.382121	0
	3L	7700548	7702628	7702654	7703846	-	FBgn0261788	Novel	0	0.20625	0	0	0.110784	0
	3L	7700548	7702628	7702654	7703846	+	FBgn0052373	Novel	0	0.209722	0	0	0.142652	0
	3L	8622934	8622992	8622997	8623077	-	FBgn0035916	Novel	0	0.484127	0	0	0.340278	0
	2R	8883399	8883472	8883492	8883622	+	FBgn0011286	FlyBase	0	0.473545	0	0	0.40625	0
	2R	9143236	9143393	9143395	9143620	-	FBgn0086656	Novel	0	0.00171821	0	0	0.203026	0
	X	10357813	10357995	10358003	10358086	-	FBgn0028331	Novel	0	0.52643	0	0	0.516516	0
	2R	10794484	10797241	10797269	10798259	-	FBgn0053144	Novel	0	0.72381	0	0	0.719375	0
	2R	10794484	10797241	10797269	10798340	-	FBgn0053144	Novel	0	0.213544	0	0	0.196047	0
	3L	12140128	12141001	12141027	12141140	+	FBgn0036257	Novel	0	0.131401	0	0	0.0525532	0
	X	12295684	12298169	12298195	12312792	+	FBgn0267001	FlyBase	0	0.507576	0	0	0.451613	0
	2R	13200824	13200889	13200906	13200998	+	FBgn0027079	FlyBase	0	0.725936	0	0	0.719697	0
	2L	13208777	13208995	13209012	13209472	+	FBgn0032482	Novel	0	0.0996457	0	0	0.0575695	0
	X	13827719	13828224	13828253	13828642	-	FBgn0030530	FlyBase	0	0.583333	0	0	0.75	0
	2L	15163764	15164104	15164130	15164207	-	FBgn0028888	Novel	0	0.363095	0	0	0.585427	0
	2R	15279924	15280322	15280348	15280907	-	FBgn0265194	Novel	0	0.341667	0	0	0.212174	0
	2R	16926807	16928125	16928151	16931112	+	FBgn0003091	FlyBase	0	0.409882	0	0	0.466007	0
	2L	17715913	17716678	17716689	17717843	-	FBgn0015609	FlyBase	0	0.571429	0	0	0.75	0
	3R	18435790	18506329	18506357	18506494	-	FBgn0004652	Novel	0	0.136364	0	0	0.43798	0
	3R	18959924	18963769	18963795	18969419	+	FBgn0263983	Novel	0	0.0260229	0	0	0.0732906	0
	3L	23007707	23010486	23010494	23010850	+	FBgn0262509	Novel	0	0.0711538	0	0	0.234883	0
	3R	24308728	24308832	24308849	24309025	+	FBgn0259685	Novel	0	0.269231	0	0	0.459091	0
	2R	24573670	24573752	24573757	24573816	+	FBgn0035027	Novel	0	0.541667	0	0	0.455714	0
	2R	24907273	24908135	24908149	24908479	+	FBgn0085434	FlyBase	0	0.437879	0	0	0.356549	0
only in body	X	13457071	13457132	13457152	13457216	+	FBgn0265416	Novel	1	0	0	0.933333	0	0
	X	13457071	13457174	13457197	13457255	+	FBgn0265416	Novel	1	0	0	0.991379	0	0
	X	13593802	13593899	13593922	13593974	-	FBgn0004169	Novel	1	0	0	0	0	0
	X	13457071	13457132	13457152	13457255	+	FBgn0265416	Novel	1	0	0	0.928571	0	0
only in gonads	none
