# Supplementary material for: Comprehensive Identification and Alternative Splicing of Microexons in Drosophila
Source: Front Genet. 2021 Mar 30;12:642602. doi: 10.3389/fgene.2021.642602 (PMC8042270; doi:10.3389/fgene.2021.642602)
Supplement: Supplementary Table 7 — List of significantly sexually AS microexons in Drosophila. [file Table_7.XLS]

## Sheet: sheet1
Table S7. List of significantly sexually AS microexons in Drosophila
Chromosome	Up exon end	Microexon start	Microexon end	Down exon start	Strand	Gene id	Tag	ΔPSI (female body vs male body)	ΔPSI (ovary vs testis)
X	15899074	15899444	15899455	15901544	+	FBgn0003392	FlyBase	0.388678	0.778218
3R	5760961	5761237	5761242	5761646	-	FBgn0027608	FlyBase	-0.189184	-0.0781268
3L	2511763	2512149	2512157	2512295	-	FBgn0010905	FlyBase	-0.466667	0.45
4	281892	281948	281973	282436	-	FBgn0039900	Novel	0.5	-0.214286
3R	6711950	6727218	6727232	6739550	-	FBgn0051481	FlyBase	-0.5	-0.770588
4	1220688	1221262	1221282	1221491	+	FBgn0263112	FlyBase	0.0989561	0.214689
2R	21021317	21021501	21021521	21021886	+	FBgn0050296	FlyBase	-0.0576845	-0.0714286
3R	7905385	7905691	7905711	7905785	-	FBgn0037530	FlyBase	0.56176	0.665853
3R	21008240	21008722	21008736	21011267	+	FBgn0013995	FlyBase	0.608601	0.94775
2R	7503028	7503172	7503195	7503649	+	FBgn0261397	FlyBase	0.279053	0.390554
3R	24159326	24159391	24159404	24159476	-	FBgn0039157	FlyBase	-0.224038	0.136364
3L	8563634	8563882	8563907	8563979	+	FBgn0260442	FlyBase	-0.0583333	-0.115385
X	20171648	20171929	20171931	20172041	-	FBgn0000084	FlyBase	-0.166163	-0.234942
2R	20429776	20431843	20431863	20459488	+	FBgn0086604	FlyBase	-0.0666667	-0.25
3R	17108839	17109708	17109722	17110214	-	FBgn0014141	FlyBase	-0.272701	-0.357143
2R	24997697	24998278	24998301	25000039	-	FBgn0265434	FlyBase	0.15	0.233516
3R	5531343	5531414	5531440	5531660	+	FBgn0010051	FlyBase	-0.375	0.1
3R	10890845	10891000	10891011	10891094	-	FBgn0037855	FlyBase	-0.239528	-0.182649
X	13806664	13808370	13808399	13809281	+	FBgn0261244	Novel	0.2	0.5
2R	7679930	7680292	7680312	7680925	-	FBgn0033212	FlyBase	0.31712	0.632222
3R	11918369	11937190	11937209	11947381	-	FBgn0037963	Novel	0.48984	-0.264259
3R	8941189	8941314	8941316	8941408	+	FBgn0037643	FlyBase	-0.305372	-0.500101
2L	4318708	4318948	4318977	4319330	+	FBgn0010473	Novel	-0.340675	-0.9
3L	10636093	10636426	10636440	10636624	-	FBgn0000629	FlyBase	-0.527191	-0.334234
X	13804421	13805452	13805475	13806532	+	FBgn0261244	FlyBase	0.587149	0.595326
X	20230617	20233423	20233443	20234775	-	FBgn0003654	FlyBase	0.290054	0.566822
3R	19240838	19241654	19241680	19242525	-	FBgn0038693	Novel	-0.125	-0.25
2R	12673339	12673899	12673928	12674991	-	FBgn0261625	FlyBase	-0.19736	-0.793902
3R	11591307	11591995	11592012	11592367	-	FBgn0051363	FlyBase	-0.264914	-0.312254
3L	7933234	7933771	7933791	7935378	-	FBgn0024187	FlyBase	0.0856706	0.340578
2L	21122389	21122913	21122927	21124135	+	FBgn0040297	FlyBase	0.0661417	0.129405
2R	16754152	16754243	16754269	16755887	-	FBgn0267002	FlyBase	-0.174915	-0.527778
3R	26579281	26579439	26579468	26579644	+	FBgn0263289	FlyBase	-0.0555556	-0.0578165
2R	4901974	4902031	4902042	4902102	-	FBgn0264911	Novel	-0.382353	-0.727885
2R	10717401	10718309	10718315	10719800	+	FBgn0024836	FlyBase	-0.666667	-0.416667
3R	6711935	6727218	6727232	6739550	-	FBgn0051481	FlyBase	0.125	-0.818182
3L	7048964	7050173	7050187	7050565	+	FBgn0260660	FlyBase	-0.259804	0.142857
2L	16475411	16481525	16481551	16483808	-	FBgn0005677	FlyBase	0.0714286	-0.832168
3R	31793470	31793578	31793607	31793877	-	FBgn0039877	FlyBase	-0.075	-0.0571429
3L	5573829	5574940	5574966	5576838	-	FBgn0015766	FlyBase	0.0597358	0.272728
3R	8017005	8017440	8017460	8018208	-	FBgn0037541	FlyBase	-0.129075	0.0559629
4	726029	726662	726683	727461	+	FBgn0005666	FlyBase	-0.0864793	0.5
2L	8317354	8317524	8317550	8317634	-	FBgn0262598	FlyBase	0.992537	0.967243
2R	17795428	17795596	17795604	17797054	+	FBgn0028743	FlyBase	0.107076	0.396972
X	134760	136055	136075	136635	+	FBgn0025836	FlyBase	0.126866	0.281536
3L	7930745	7931232	7931249	7931755	-	FBgn0024187	FlyBase	0.256711	0.451186
X	11387933	11394223	11394246	11395240	+	FBgn0001624	FlyBase	0.202381	0.297619
3R	21008240	21010586	21010615	21011267	+	FBgn0013995	FlyBase	0.0557123	0.180523
X	13597404	13598174	13598176	13599416	-	FBgn0004169	FlyBase	0.0573495	-0.0900493
X	746115	746280	746303	746517	+	FBgn0021764	FlyBase	-0.492289	-0.649259
3L	9353228	9353513	9353518	9353738	-	FBgn0035978	FlyBase	0.130323	0.307109
2L	4985424	4985733	4985762	4985862	+	FBgn0083962	FlyBase	-0.134557	-0.185217
3L	2514197	2514310	2514330	2524599	-	FBgn0010905	FlyBase	-0.278039	-0.665438
2R	19456253	19467884	19467913	19468790	+	FBgn0260934	Novel	-0.0680166	0.916667
3R	4133919	4134146	4134172	4134367	+	FBgn0027341	FlyBase	0.0835699	-0.258356
2R	12673339	12673899	12673928	12676125	-	FBgn0261625	FlyBase	-0.728186	-0.94366
3L	6739825	6739896	6739921	6740305	-	FBgn0261934	Novel	0.102381	0.0867063
2R	12673339	12673899	12673925	12674991	-	FBgn0261625	Novel	-0.54488	-0.853495
2L	7649083	7649189	7649200	7649304	-	FBgn0264087	FlyBase	-0.204365	-0.575
2L	8193229	8194045	8194059	8195021	-	FBgn0031995	FlyBase	-0.35499	-0.221819
X	11390540	11394223	11394246	11395240	+	FBgn0001624	FlyBase	-0.0821803	0.111872
X	11436396	11436775	11436792	11437023	-	FBgn0262740	FlyBase	0.140555	0.150975
3R	27254728	27255016	27255024	27255090	+	FBgn0011289	FlyBase	0.436085	0.148633
3R	30386828	30387103	30387111	30387464	-	FBgn0015222	FlyBase	0.197449	0.248227
X	8174214	8174547	8174567	8174823	-	FBgn0030018	FlyBase	-0.254261	0.0531717
2L	4988848	4989390	4989410	4990308	+	FBgn0083962	FlyBase	0.484537	0.335401
2R	12618550	12618608	12618636	12618781	+	FBgn0266487	Novel	-0.113636	-0.232684
3L	22760240	22760789	22760809	22777111	+	FBgn0052451	FlyBase	-0.607143	-0.509119
3R	18435790	18463267	18463281	18515052	-	FBgn0004652	FlyBase	-0.142857	-0.666667
X	16550465	16551475	16551489	16552340	-	FBgn0011742	FlyBase	0.563244	0.370233
2R	12673339	12673899	12673925	12676125	-	FBgn0261625	Novel	-0.715581	-0.86222
